# Supplementary material for: Structures of MPND Reveal the Molecular Recognition of Nucleosomes
Source: MDPI journal article supplement (doi:10.3390/ijms24043368), 2023-02-08
Supplement: s1 [file s1]

# Supplementary Information

## Structures of MPND Reveal the Molecular Recognition of Nucleosomes

Meiting Yang, Xiaorong Li, Zizi Tian, Lulu Ma, Jun Ma, Yunlong Liu, Guohui Shang, Ailing Liang, Wei Wu and Zhongzhou Chen

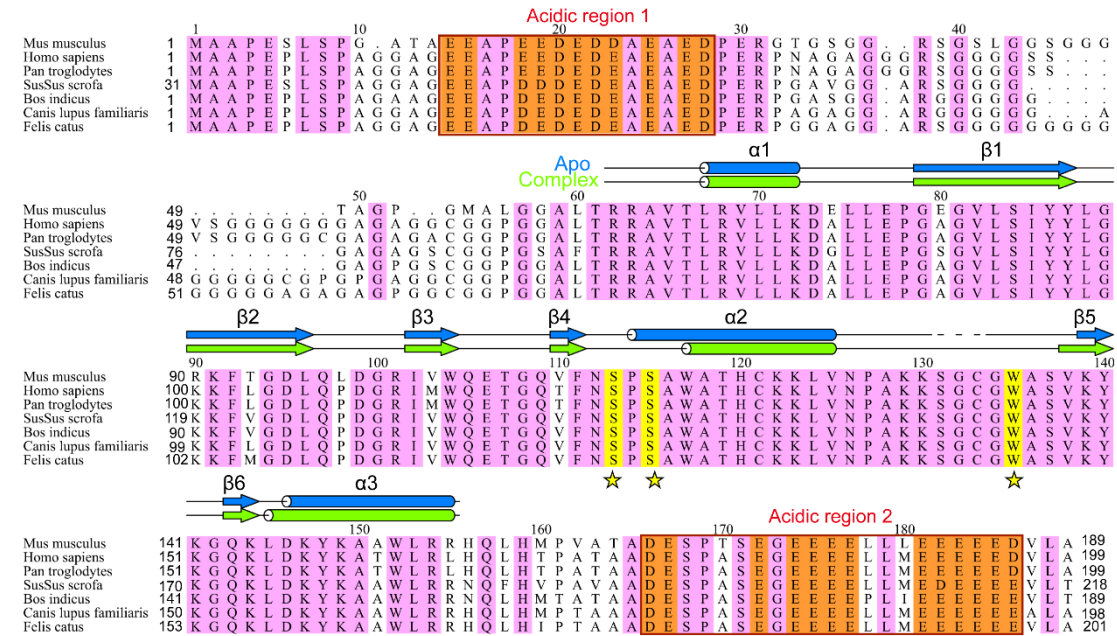

**Figure S1.** Structure-based sequence alignment of MPND proteins from different species. Secondary structural elements of the DNA-free and DNA-bound MPND structures were calculated using DSSP and colored in blue and green, respectively. Cylinders and arrows represent  $\alpha$ -helices and  $\beta$ -strands, respectively. The invariant residues between different species are shown in pink. Acidic residues in the two acidic regions are shown in orange. Yellow stars indicate residues used in mutational analyses. The sequences used are: MPND from *Mus musculus* (NP\_080806.4); *Homo sapiens* (NP\_116257.2); *Pan troglodytes* (XP\_016790200.1); *Sus scrofa* (XP\_013850219.2); *Bos indicus* (XP\_019819993.1); *Canis lupus familiaris* (XP\_013977660.2); *Felis catus* (XP\_023099774.2). The ALINE program [1] was used to prepare the figure. Note that only chain D in the complex has conformational change of  $\alpha 2$ .

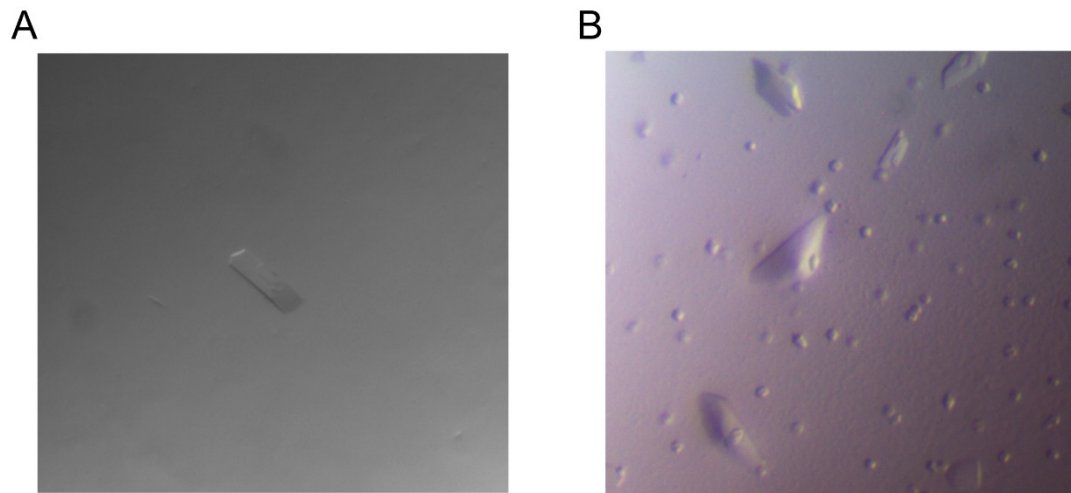

**Figure S2.** Crystals for diffraction experiments. Crystals of apo-MPND (A) and MPND-DNA complex (B).

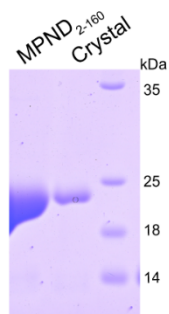

**Figure S3.** The apo-MPND proteins before and after crystallization. The sizes of these two proteins were equal (~17 kDa), which meant that the missing residues in the apo-MPND structure were due to their flexibility.

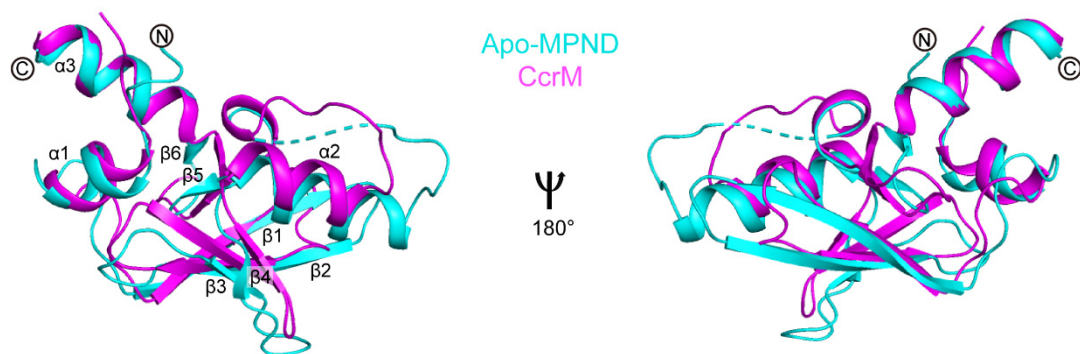

**Figure S4.** Structural superimposition of apo-MPND (cyan) onto DNA methyltransferase protein (magenta) (CcrM, PDB ID: 6PBD, Z = 10.4, RMSD = 1.9 Å) [2].



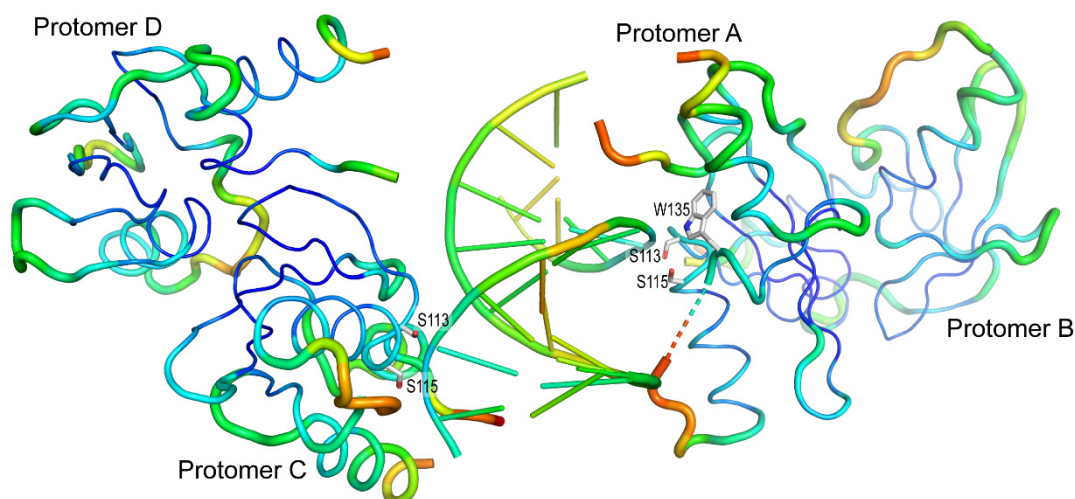

**Figure S8.** Temperature factor of the MPND-DNA complex, and color-coded based on the calculated B-factor. The colors ranged from blue to red, corresponding to increasing fluctuations. The key residues were displayed in the stick form.

**Table S1.** Oligonucleotides used in this study.

| ID                         | Sequence (5'-3')                           |  |
|----------------------------|--------------------------------------------|--|
| ssDNA1-F                   | TCAGCAACAGAAGAGGATCTC                      |  |
| ssDNA1-R                   | GAGATCCTCTTCTGTTGCTGA                      |  |
| ssDNA2-F                   | GATGCAAGCATCAGCAACAGAAGAGGATCTCAGGTGCAGCGC |  |
| ssDNA2-R                   | GCGCTGCACCTGAGATCCTCTTCTGTTGCTGATGCTTGCATC |  |
| ssDNA3-F                   | AGCAACAGAAGAGGATCT                         |  |
| ssDNA3-R                   | AGATCCTCTTCTGTTGCT                         |  |
| ssDNA4-F(6mA) <sup>1</sup> | AGCAAC <u>A</u> GAAG <u>A</u> GGATCT       |  |
| ssDNA4-R                   | AGATCCTCTTCTGTTGCT                         |  |
| ssDNA5-F                   | GCAACAGAAGAGGAT                            |  |
| ssDNA5-R                   | ATCCTCTTCTGTTGC                            |  |
| Bubble3-F                  | TCAGCAACAGAAGAGGATCTC                      |  |
| Bubble3-R                  | GAGATCCTCTGAGGTTGCTGA                      |  |
| Bubble6-F                  | TCAGCAACAGAAGAGGATCTC                      |  |
| Bubble6-R                  | GAGATCCGAGGAGGTTGCTGA                      |  |
| Bubble9-F                  | TCAGCAACAGAAGAGGATCTC                      |  |
| Bubble9-R                  | GAGATCCGAGGAGTGGGCTGA                      |  |
| Bulge3-F                   | TCAGCAACAGAAGAGGATCTC                      |  |
| Bulge3-R                   | GAGATCCTCTGTTGCTGA                         |  |
| Bulge6-F                   | TCAGCAACAGAAGAGGATCTC                      |  |
| Bulge6-R                   | GAGATCCGTTGCTGA                            |  |

<sup>1</sup>6mA: Adenine is methylated at the 6th position of the purine ring (N6) in DNA, represented by A.

**Table S2.** SAXS data-collection and analysis.

| Parameter                  | Value           |
|----------------------------|-----------------|
| Data collection            |                 |
| Instrument                 | SSRF BL19U2     |
| Wavelength (Å)             | 1.03            |
| Beam size (μm)             | 320 × 43        |
| Exposure time (s)          | 1.0             |
| Camera length (m)          | 2.68            |
| Temperature (K)            | 283             |
| Concentration (mg/ml)      | 1.0-5.0         |
| Software employed          |                 |
| Primary data reduction     | BioXTAS-RAW [3] |
| Validation                 | FoXS [4]        |
| Three-dimensional graphics | PyMOL [5]       |

**Supplementary references:**

1. Bond, C.S.A.W. Schüttelkopf. ALINE: a WYSIWYG protein-sequence alignment editor for publication-quality alignments. *Acta Crystallogr. D* **2009**, *65*, 510-512.
2. Horton, J.R.; C.B. Woodcock.; S.B. Opot.; N.O. Reich.; X. ZhangX. Cheng. The cell cycle-regulated DNA adenine methyltransferase CcrM opens a bubble at its DNA recognition site. *Nat. Commun.* **2019**, *10*, 4600.
3. Nielsen, S.S.; K.N. Toft.; D. Snakenborg.; M.G. Jeppesen.; J.K. Jacobsen.; B. Vestergaard.; J.P. KutterL. Arleth. BioXTAS RAW, a software program for high-throughput automated small-angle X-ray scattering data reduction and preliminary analysis. *J Appl Crystallogr* **2009**, *42*, 959-964.
4. Schneidman-Duhovny, D.; M. Hammel.; J.A. TainerA. Sali. Accurate SAXS profile computation and its assessment by contrast variation experiments. *Biophys. J.* **2013**, *105*, 962-974.
5. Mooers, B.H.M. Shortcuts for faster image creation in PyMOL. *Protein Sci.* **2020**, *29*, 268-276.
